# Supplementary material for: Impact of the Monocarboxylate Transporter-1 (MCT1)-Mediated Cellular Import of Lactate on Stemness Properties of Human Pancreatic Adenocarcinoma Cells
Source: MDPI journal article supplement (doi:10.3390/cancers12030581), 2020-03-03
Supplement: s1 [file s1]

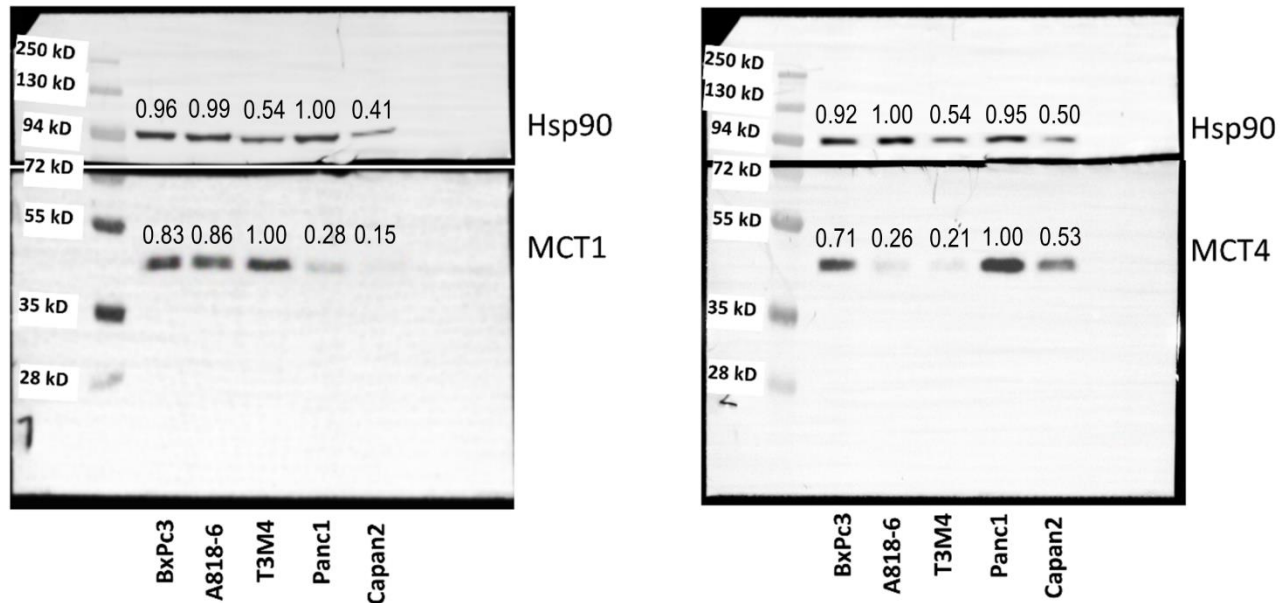

Figure 2A: original blots including size standard and band intensity ratios

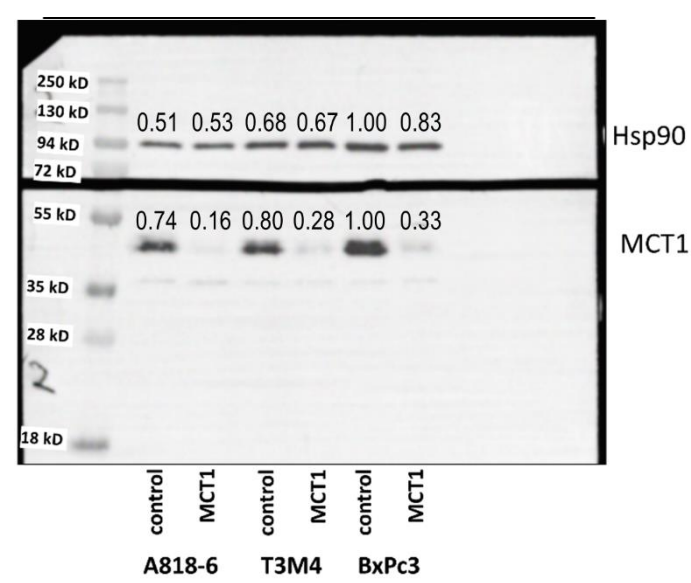

Figure 2C: original blots including size standard and band intensity ratios

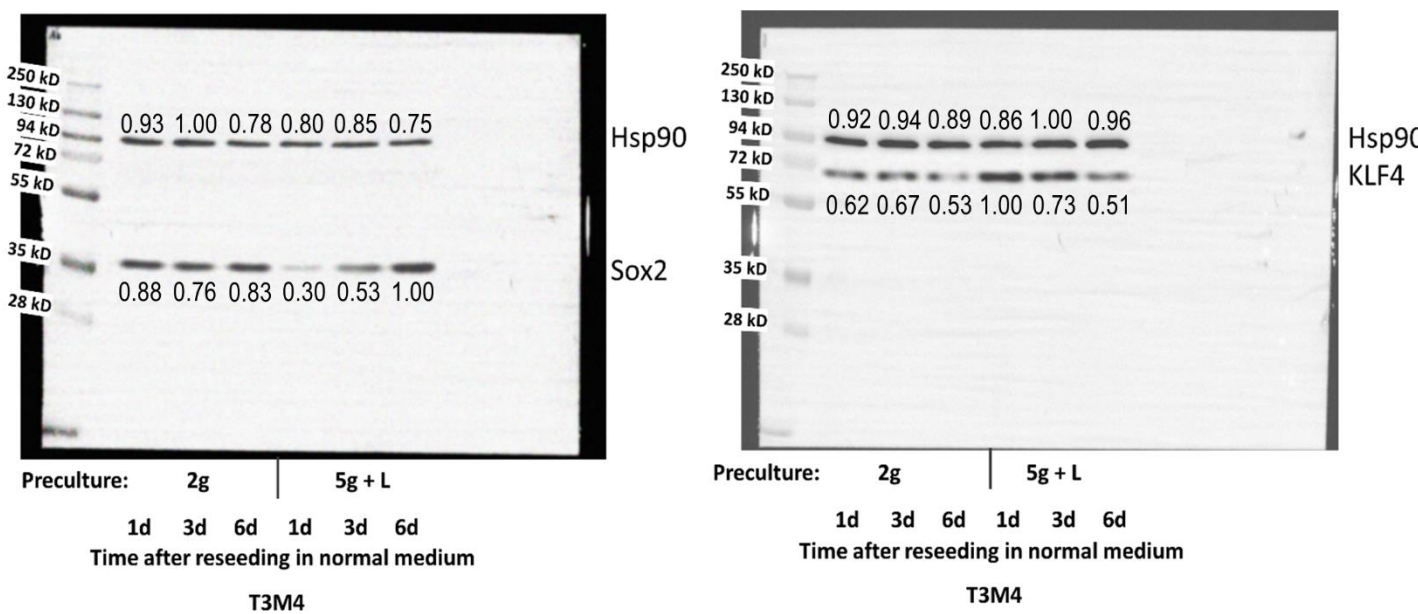

Figure 6D: original blots including size standard and band intensity ratios
